# Supplementary material
Source: Springer Nature journal article supplement (https://www.springermedizin.de/resource/supplementary/13020_2009_67_MOESM6_ESM.pdf/9640994)
Supplement: MOESM6 [file 9640994]

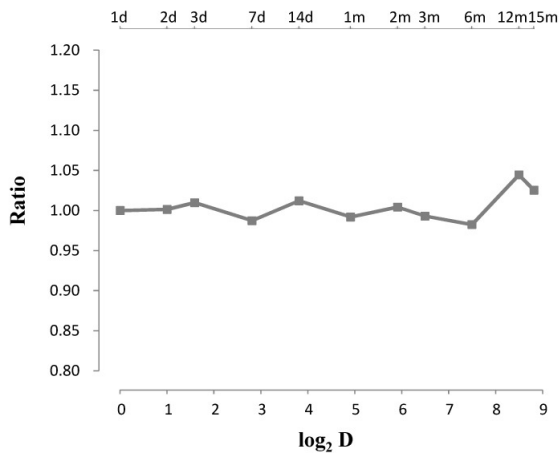

Aesculetin

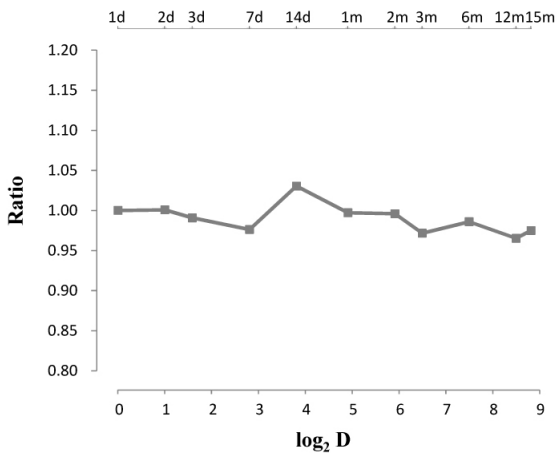

Hesperidin

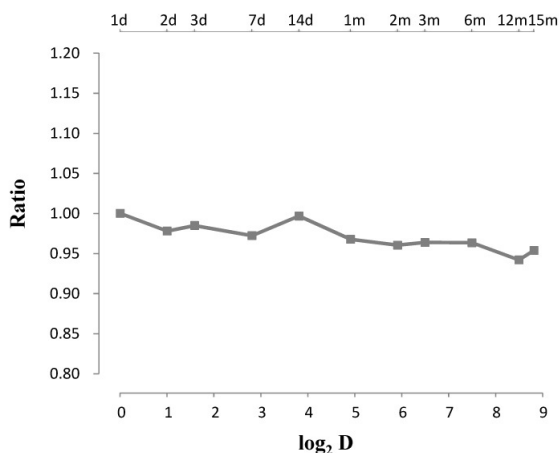

Palmatine

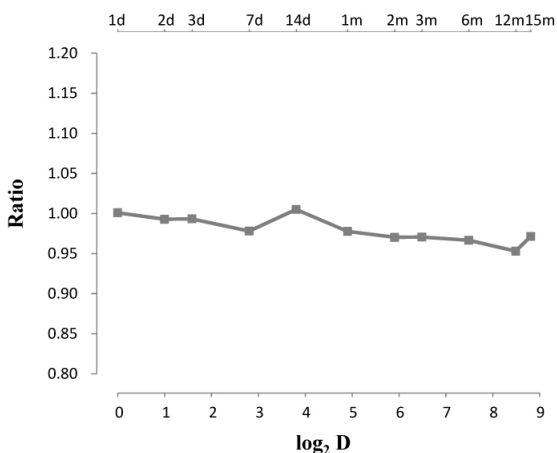

Berberine

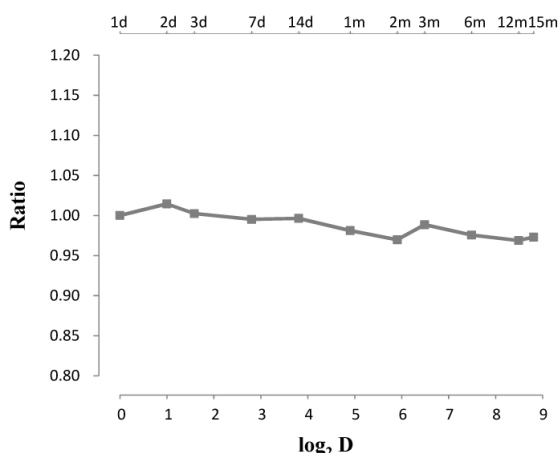

Glycyrrhizic acid

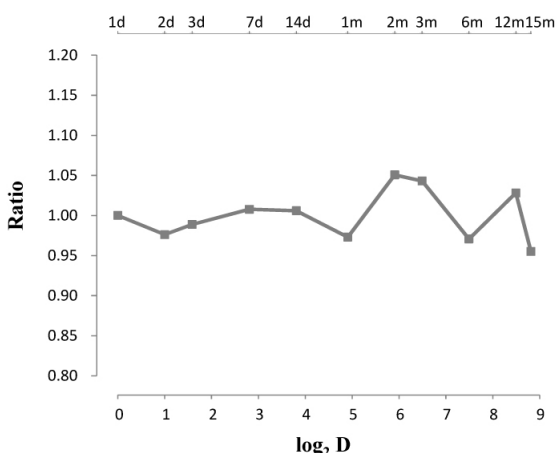

Schisandrin

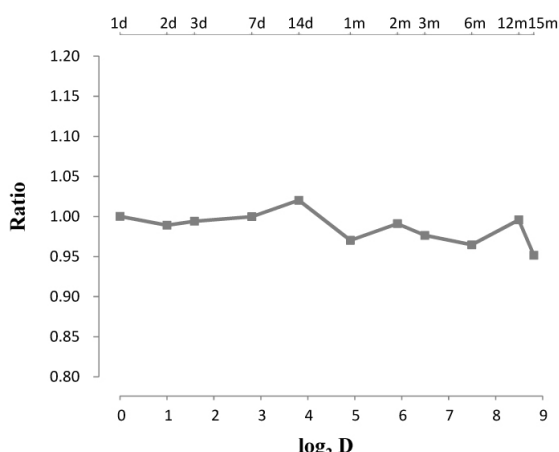

Honokiol

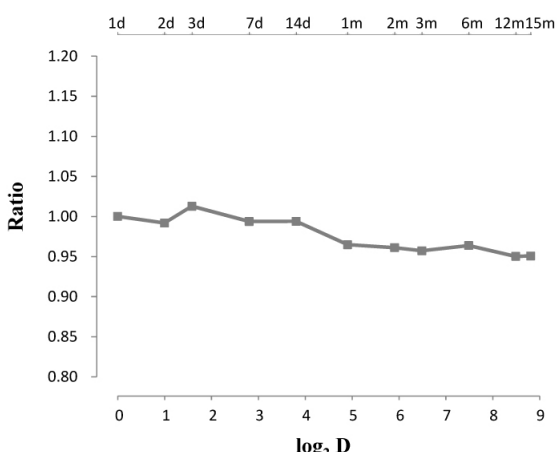

Magnolol
